# Supplementary material
Source: HighWire-hosted journal article supplement (https://www.cmaj.ca/highwire/filestream/59059/field_highwire_adjunct_files/0/combo-top-1-at.pdf)
Supplement: combo-top-1-at.pdf [file combo-top-1-at.pdf]

**Appendix 1: Measles–mumps–rubella and varicella vaccination schedules and age of administration across Canada, by dose<sup>1</sup>**

| Province or territory     | Dose 1 |           |       | Dose 2 |           |         |
|---------------------------|--------|-----------|-------|--------|-----------|---------|
|                           | MMR    | Varicella | MMRV  | MMR    | Varicella | MMRV    |
| British Columbia          | 12 mo  | 12 mo     | —     | —      | —         | 4–6 yr* |
| Alberta                   | —      | —         | 12 mo | —      | —         | 4–6 yr  |
| Saskatchewan              | —      | —         | 12 mo | —      | —         | 18 mo   |
| Manitoba                  | —      | —         | 12 mo | 4–6 yr | —         | —       |
| Ontario                   | 12 mo  | 15 mo     | —     | —      | —         | 4–6 yr  |
| Quebec                    | 12 mo  | —         | —     | —      | —         | 18 mo   |
| New Brunswick             | —      | —         | 12 mo | —      | —         | 18 mo   |
| Nova Scotia               | —      | —         | 12 mo | —      | —         | 4–6 yr  |
| Prince Edward Island      | —      | —         | 12 mo | —      | —         | 18 mo   |
| Newfoundland and Labrador | —      | —         | 12 mo | 18 mo  | —         | —       |
| Northwest Territories     | 12 mo  | 12 mo     | —     | 18 mo  | —         | —       |
| Yukon                     | 12 mo  | 12 mo     | —     | 4–6 yr | 4–6 yr    | —       |
| Nunavut                   | 12 mo  | 15 mo     | —     | 18 mo  | —         | —       |

Note: MMR = measles–mumps–rubella, MMRV = measles–mumps–rubella–varicella.  
 \*Starting in July 2014.  
 Adapted with permission from the Canadian Nurses Coalition on Immunization.<sup>1</sup>

**Reference**

1. *Publicly funded immunization programs in Canada - routine schedule for infants and children including special programs and catch-up programs (as of March 2014)*. Ottawa: Public Health Agency of Canada; 2014. Available: [www.phac-aspc.gc.ca/im/ptimprog-progimpt/table-1-eng.php](http://www.phac-aspc.gc.ca/im/ptimprog-progimpt/table-1-eng.php) (updated 2014 Mar. 17; accessed 2014 June 12).
